# Supplementary material
Source: PubMed Central journal article supplement (PMC4503317)
Supplement: NIHMS629786-supplement-3.pdf [file NIHMS629786-supplement-3.pdf]

|                                 |          | GAINS  |      | LOSSES |      |
|---------------------------------|----------|--------|------|--------|------|
|                                 |          | mean   | sem  | mean   | sem  |
| AIC                             | Off drug | 35.58  | 0.59 | 36.58  | 0.72 |
|                                 | Placebo  | 35.82  | 0.63 | 36.23  | 0.64 |
|                                 | On drug  | 36.32  | 0.13 | 36.95  | 0.18 |
| BIC                             | Off drug | 38.51  | 0.59 | 39.51  | 0.72 |
|                                 | Placebo  | 38.75  | 0.63 | 39.16  | 0.64 |
|                                 | On drug  | 39.25  | 0.13 | 39.88  | 0.18 |
| pseudoR2                        | Off drug | 0.29   | 0.01 | 0.27   | 0.02 |
|                                 | Placebo  | 0.28   | 0.01 | 0.27   | 0.01 |
|                                 | On drug  | 0.27   | 0.00 | 0.26   | 0.00 |
| LLE model                       | Off drug | -15.79 | 0.30 | -16.29 | 0.36 |
|                                 | Placebo  | -15.91 | 0.32 | -16.11 | 0.32 |
|                                 | On drug  | -16.16 | 0.07 | -16.48 | 0.09 |
| LLE ratio                       | Off drug | 12.78  | 0.59 | 11.78  | 0.72 |
|                                 | Placebo  | 12.54  | 0.63 | 12.14  | 0.64 |
|                                 | On drug  | 12.04  | 0.13 | 11.41  | 0.18 |
| Learning rate ( $\alpha$ )      | Off drug | 0.32   | 0.05 | 0.28   | 0.07 |
|                                 | Placebo  | 0.19   | 0.03 | 0.33   | 0.04 |
|                                 | On drug  | 0.25   | 0.04 | 0.40   | 0.06 |
| Inverse temperature ( $\beta$ ) | Off drug | 8.16   | 1.55 | 2.34   | 0.57 |
|                                 | Placebo  | 8.84   | 1.63 | 4.74   | 1.02 |
|                                 | On drug  | 12.29  | 1.91 | 4.06   | 0.84 |

AIC = Aikaie Information Criterion, BIC = Bayesian Information Criterion, LLE = maximum logarithmic likelihood of choices under the RL model, LLE ratio = likelihood ratio test.

**Supplementary Table 1.**

**Quantification of reinforcement model fits and model parameters.**

|            | Off drug |     | Placebo |     | On drug |     |
|------------|----------|-----|---------|-----|---------|-----|
|            | mean     | sem | mean    | sem | mean    | sem |
| Anxiety    | 35.0     | 2.4 | 33.4    | 1.5 | 33.4    | 2.3 |
| Digit span | 6.6      | 0.3 | 7.1     | 0.3 | 6.9     | 0.3 |
| Digit span | 4.5      | 0.3 | 5.1     | 0.4 | 4.9     | 0.3 |
| Apathy     | 8.8      | 1.4 | 9.5     | 1.2 | 8.9     | 1.3 |
| UPDRS III  | 17.3     | 2.3 | 17.3    | 2.0 | 12.7    | 1.9 |
| Expectancy | 33.1     | 8.0 | 53.9    | 8.9 | 55.3    | 7.6 |

**Supplementary Table 2**

**Clinical and neuropsychological measures across treatments.**
